# Supplementary material for: N-Terminal Acetyltransferase Naa40p Whereabouts Put into N-Terminal Proteoform Perspective
Source: MDPI journal article supplement (doi:10.3390/ijms22073690), 2021-04-01
Supplement: s1 [file s1]

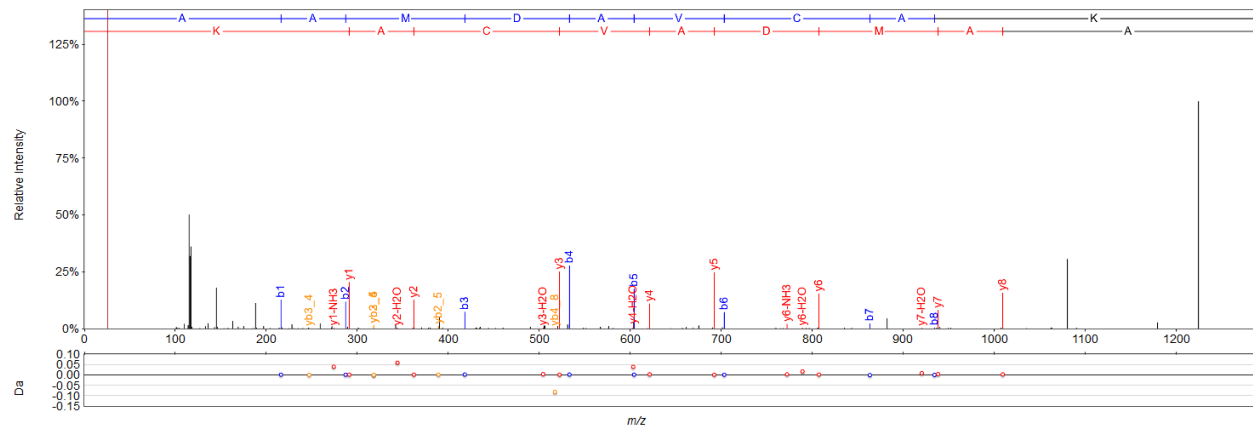

**Figure S1** Representative MS<sup>2</sup> spectrum matching a doubly charged precursor mass of  $m/z$  935.4205, corresponding to the modified peptide sequence AAMDAVC<Cmm>AK matching AA-sequence 20 to 28 of hNaa40p as reported in ProteomicsDB ([1], accessed January 2021) and with 'Cmm' and 'iTRAQ' denoting an carbamidomethyl and iTRAQ moiety.

## Reference

1. Samaras, P. et al. (2020) ProteomicsDB: a multi-omics and multi-organism resource for life science research. Nucleic Acids Res 48 (D1), D1153-D1163.
